# Supplementary material for: Evolutionary radiation of earless frogs in the Andes: molecular phylogenetics and habitat shifts in high-elevation terrestrial breeding frogs
Source: PeerJ. 2018 Feb 22;6:e4313. doi: 10.7717/peerj.4313 (PMC5825883; doi:10.7717/peerj.4313)
Supplement: Data S2 [file peerj-06-4313-s003.xlsx]

## Sheet: Elevational_range_data.csv
species	habitat	minElev	maxElev	elevRange	midpoint	Notes
Phrynopus auriculatus	Montane forest				2600	See Rodriguez & Catenazzi (2017) and original species description
Phrynopus badius	Montane forest				2900	See Rodriguez & Catenazzi (2017) and original species description
Phrynopus barthlenae	Andean grassland	3425	3770	345	3598	See Rodriguez & Catenazzi (2017) and original species description
Phrynopus bracki	Montane forest				2600	See Rodriguez & Catenazzi (2017) and original species description
Phrynopus bufoides	Andean grassland	3850	4100	250	3975	See Rodriguez & Catenazzi (2017) and original species description
Phrynopus daemon	Montane forest	3140	3340	200	3240	See Rodriguez & Catenazzi (2017) and original species description
Phrynopus heimorum	Montane forest	3420	3430	10	3425	Lehr (2001)
Phrynopus horstpauli	Montane forest	3010	3770	760	3390	See Rodriguez & Catenazzi (2017) and original species description
Phrynopus interstinctus	Montane forest	3100	3180	80	3140	See Rodriguez & Catenazzi (2017) and original species description
Phrynopus inti	Both	3350	3890	540	3620	See Rodriguez & Catenazzi (2017) and original species description
Phrynopus juninensis	Both	3493	3525	32	3509	Elevational data and voucher specimens collected near type locality (RvM55_14, RvM57_14, RvM58_14)
Phrynopus kauneorum	Montane forest	3020	3380	360	3200	See Rodriguez & Catenazzi (2017) and original species description
Phrynopus miroslawae	Montane forest				3363	See Rodriguez & Catenazzi (2017) and original species description
Phrynopus montium	Montane forest				3493	von May (2017)
Phrynopus peruanus	Andean grassland	3825	4000	175	3913	Lower elevational limit from Lehr (2007); upper elevational limit data and voucher specimens collected near type locality (RvM20_12, RvM21_12, ..., RvM26_12)
Phrynopus pesantesi	Andean grassland	4280	4390	110	4335	See Rodriguez & Catenazzi (2017) and original species description
Phrynopus sp	Andean grassland	3600	3850	250	3725	Undescribed species from Huanuco; P. juninensis in Lehr et al. (2005)
Phrynopus spI	Montane forest				3525	von May (unpublished data)
Phrynopus tautzorum	Andean grassland				3770	See Rodriguez & Catenazzi (2017) and original species description
Phrynopus tribulosus	Both	2600	3589	989	3095	Lower elevational limit from Duellman & Hedges (2008), which includes the species description of P. tribulosus ; upper elevational limit from Chaparro et al. (2008), which includes the species description of P. nicoleae. P. nicoleae is a junior synonym of P. tribulosus (this study). Likewise, P. curator (described based on specimens collected at 3000 m a.s.l. in the same area; Lehr et al. 2012) i…
Phrynopus unchog	Montane forest	3276	3477	201	3377	Lehr & Rodriguez 2017
Phrynopus vestigiatus	Montane forest				3100	See Rodriguez & Catenazzi (2017) and original species description
